# Supplementary material
Source: PubMed Central journal article supplement (PMC6440481)
Supplement: NIHMS1519567-supplement-1.pdf [file NIHMS1519567-supplement-1.pdf]

Figure S1

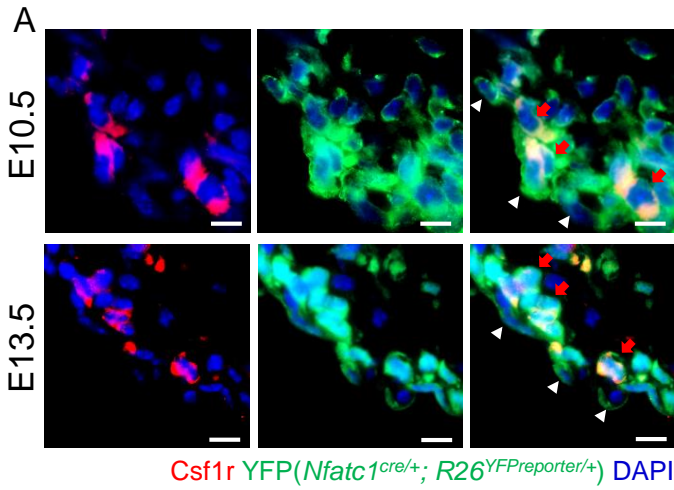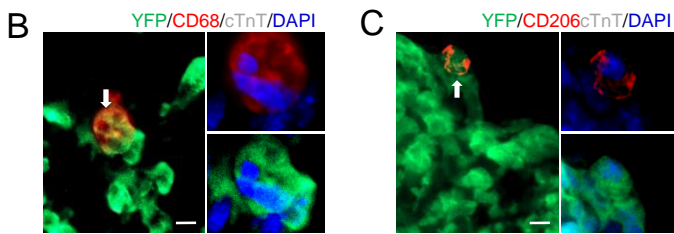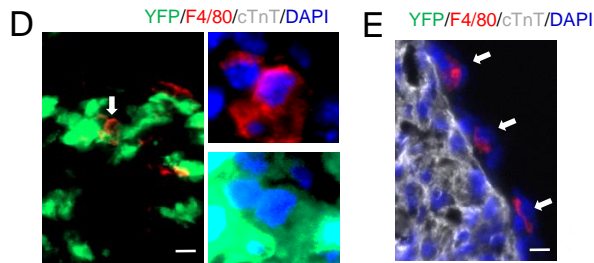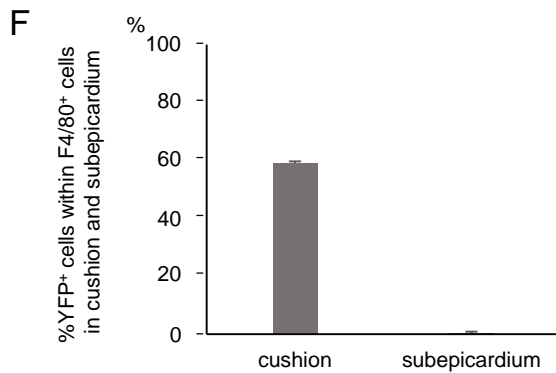

**G**

| Counted cell number (X40) | Number in bar-graph |
|---------------------------|---------------------|
| 0                         | 0                   |
| 0-1                       | 0.5                 |
| 1                         | 1                   |
| 2                         | 2                   |
| 2-5                       | 3                   |
| >5                        | 4                   |

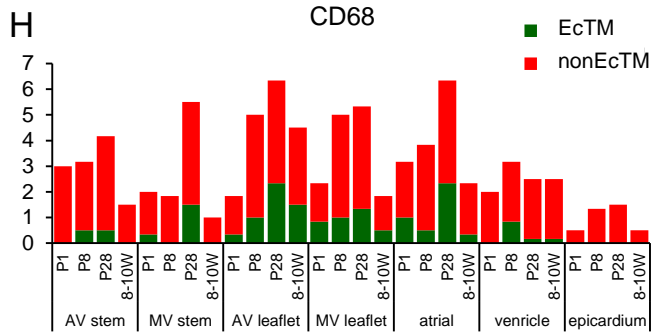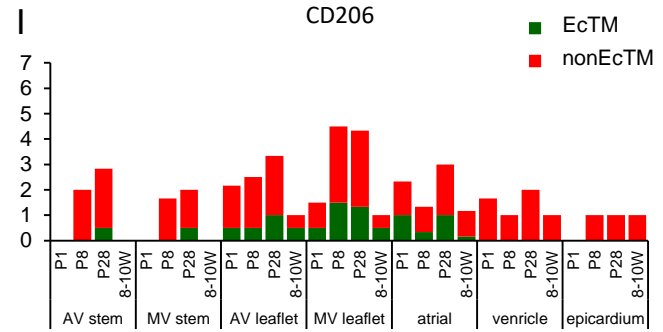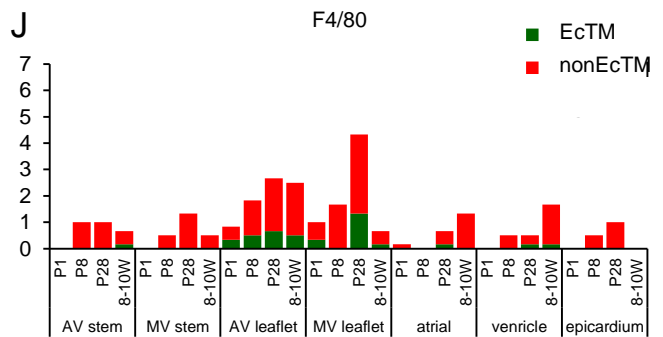

Figure S2

A

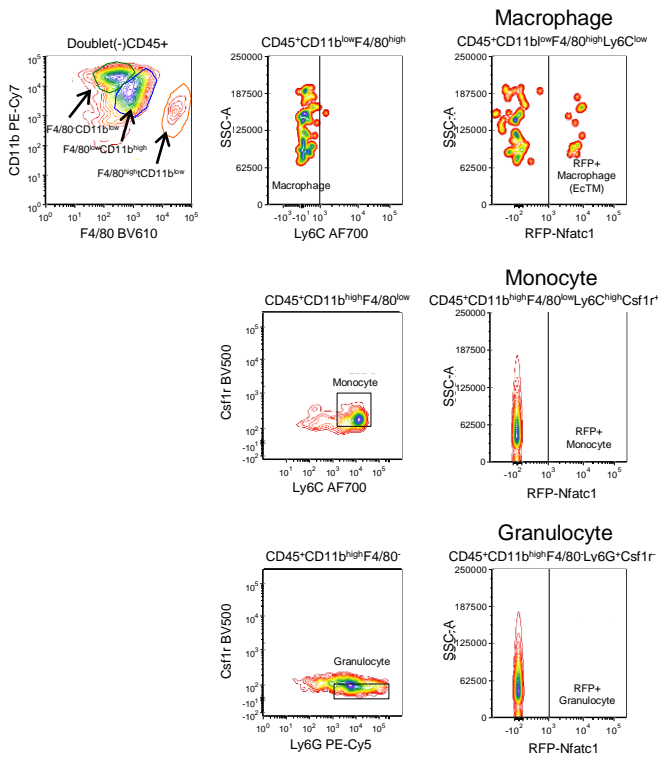

B

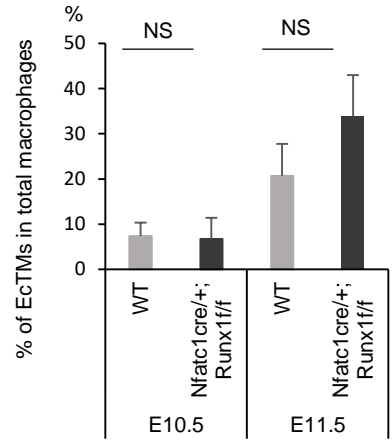

C

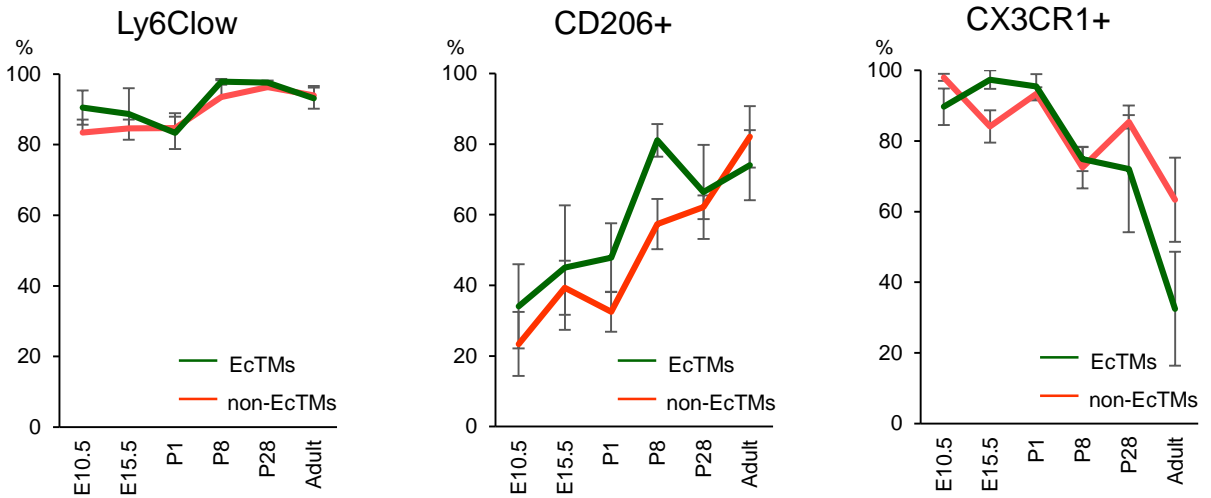

Figure S3

A

|                                                          | Total Expected Pups | Total Experimental Pups |
|----------------------------------------------------------|---------------------|-------------------------|
| <i>Csf1<sup>fllox/+</sup></i>                            | 35 (25%)            | 27 (19.3%)              |
| <i>Csf1<sup>fllox/flox</sup></i>                         | 35 (25%)            | 53 (37.9%)              |
| <i>Nfatc1<sup>cre/+</sup>; Csf1<sup>fllox/+</sup></i>    | 35 (25%)            | 40 (28.6%)              |
| <i>Nfatc1<sup>cre/+</sup>; Csf1<sup>fllox/flox</sup></i> | 35 (25%)            | 20 (14.2%)*             |
| Total                                                    | 140                 | 140                     |

\* $P < 0.05$

B

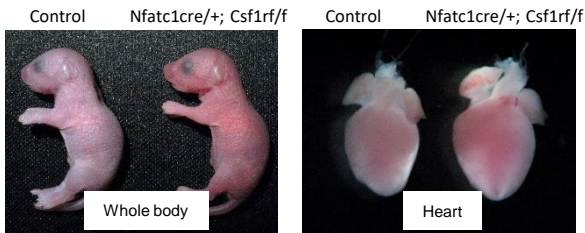

C

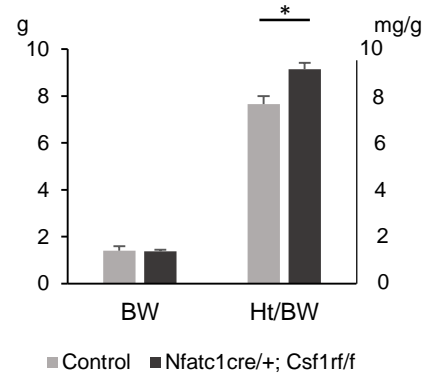

D

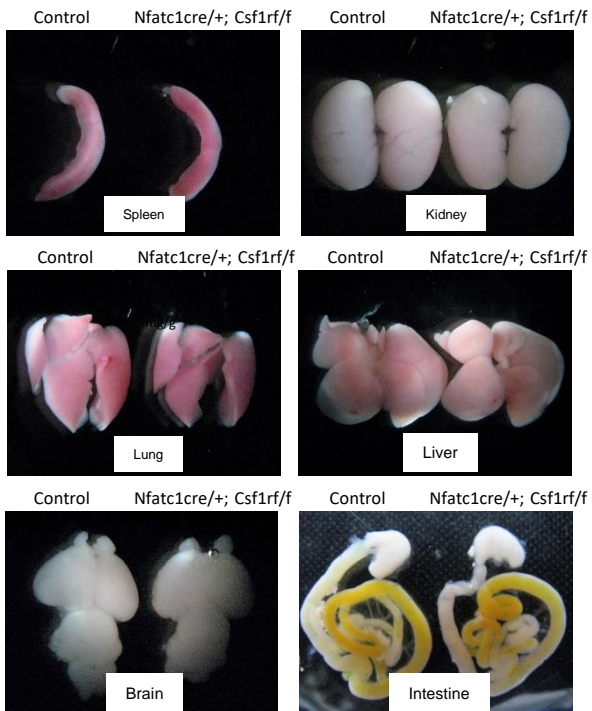

E

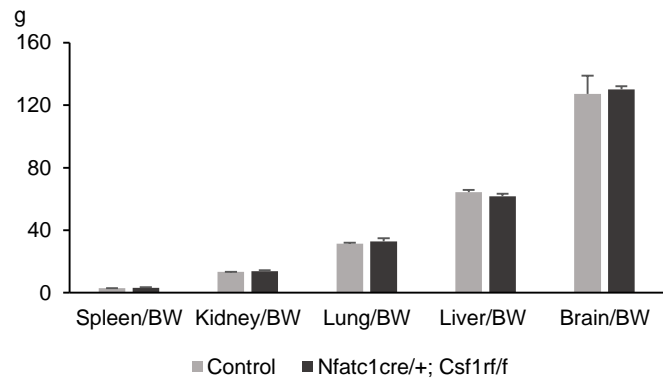

Figure S4

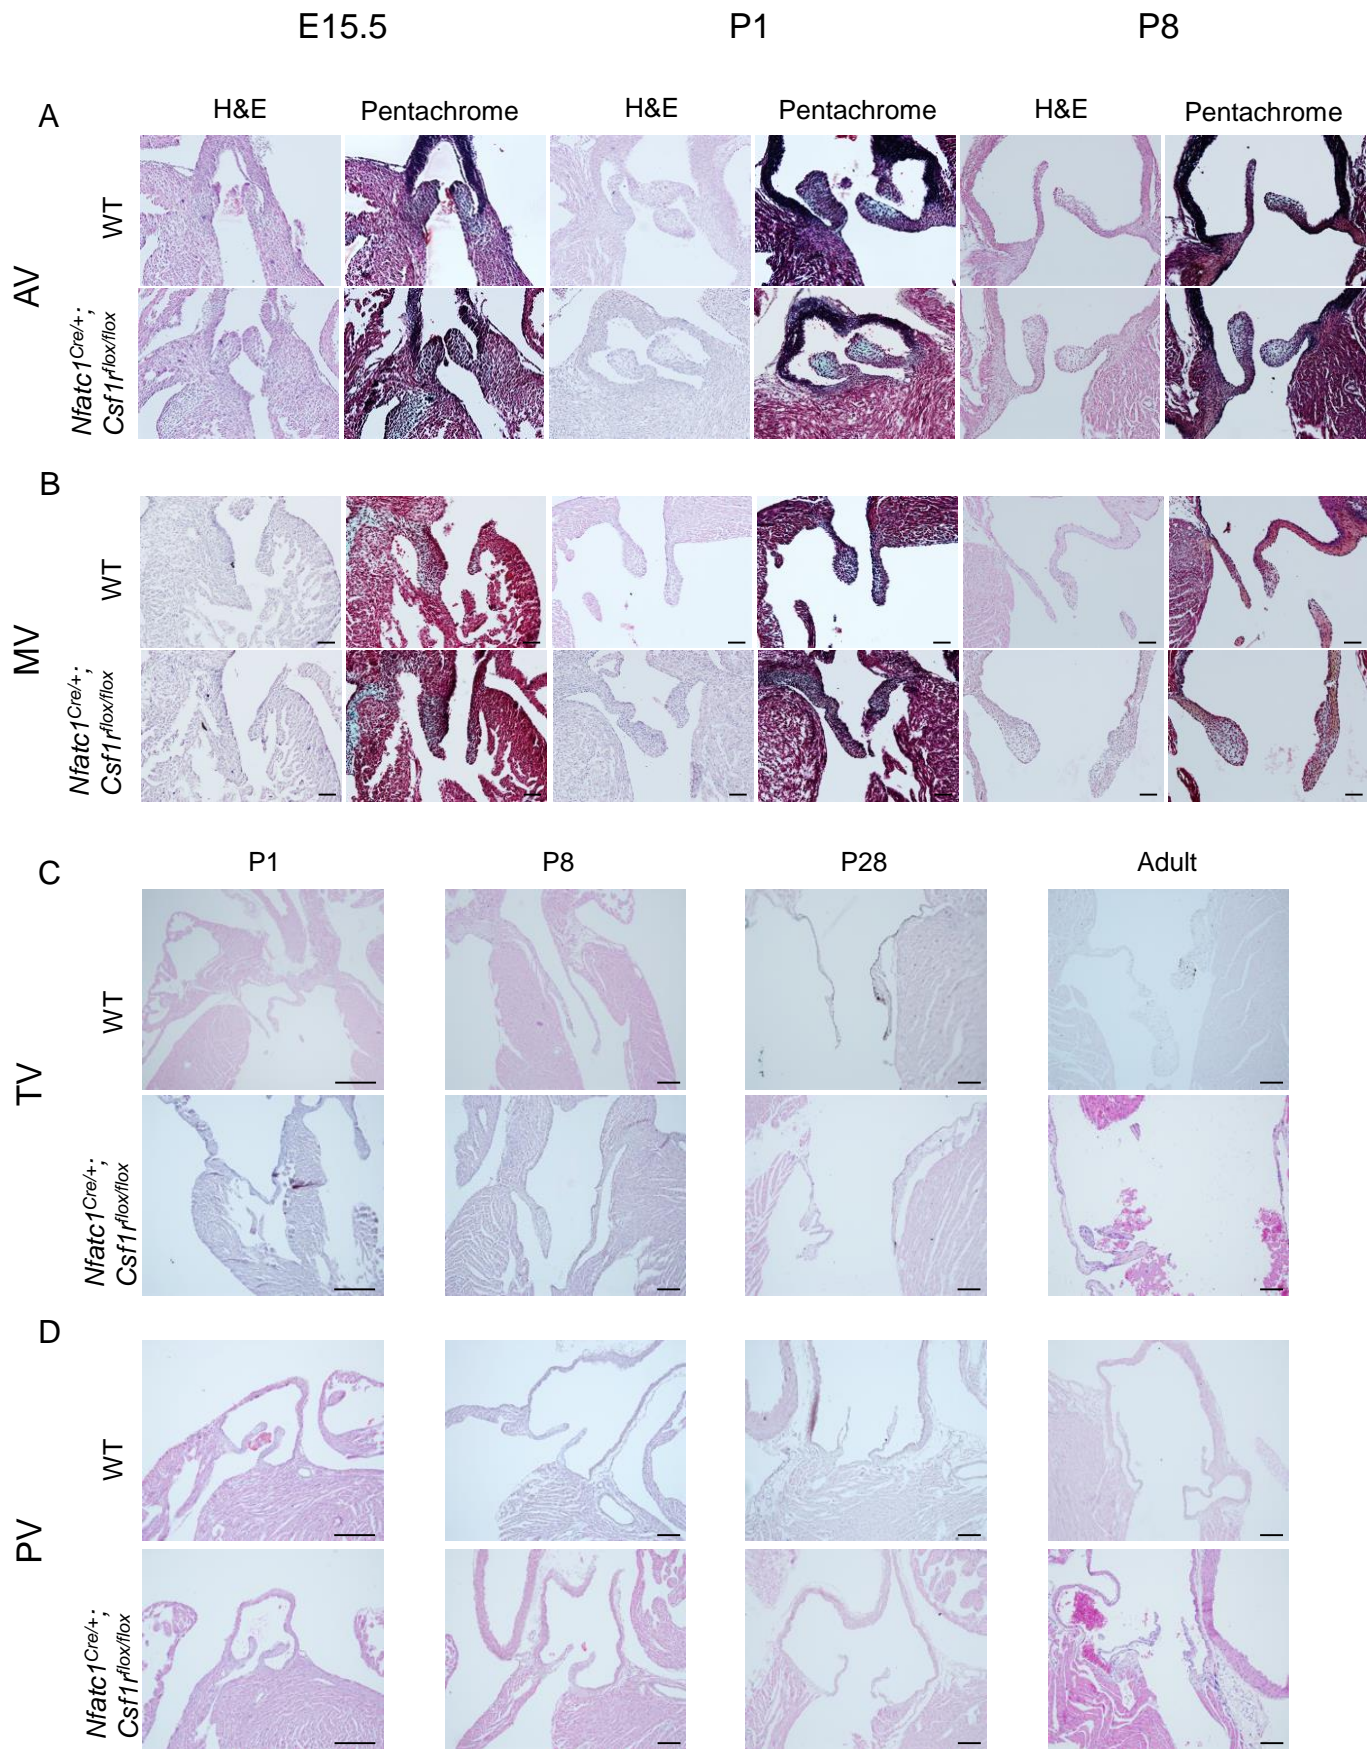

Figure S5

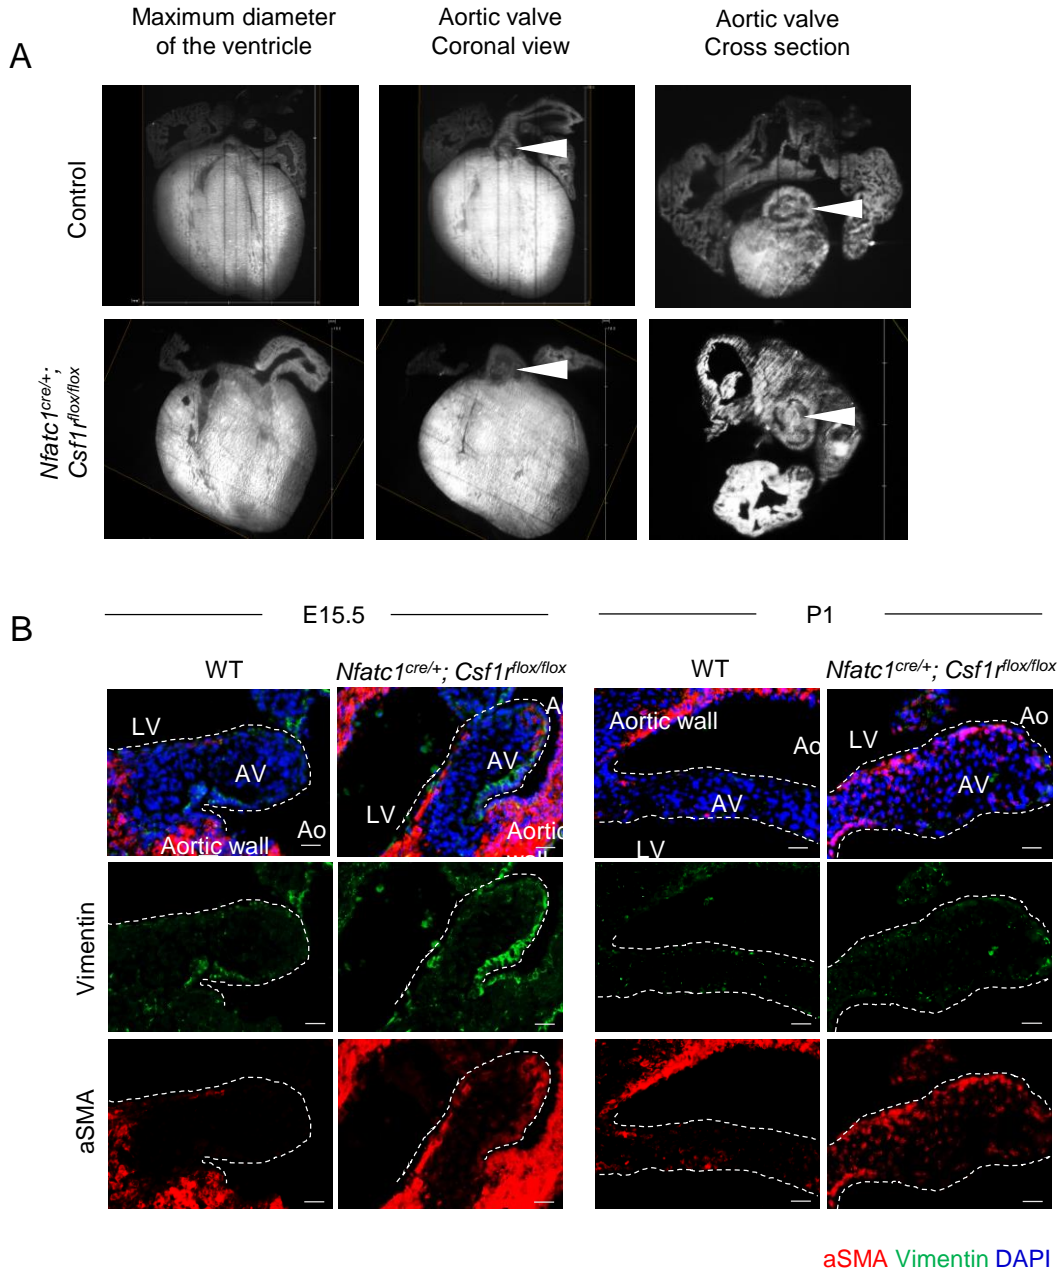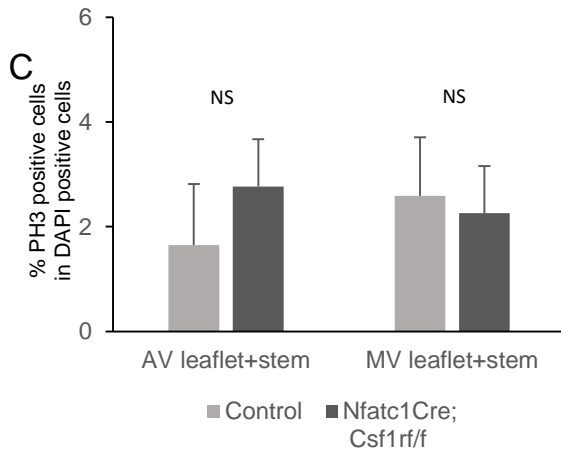

Figure S6

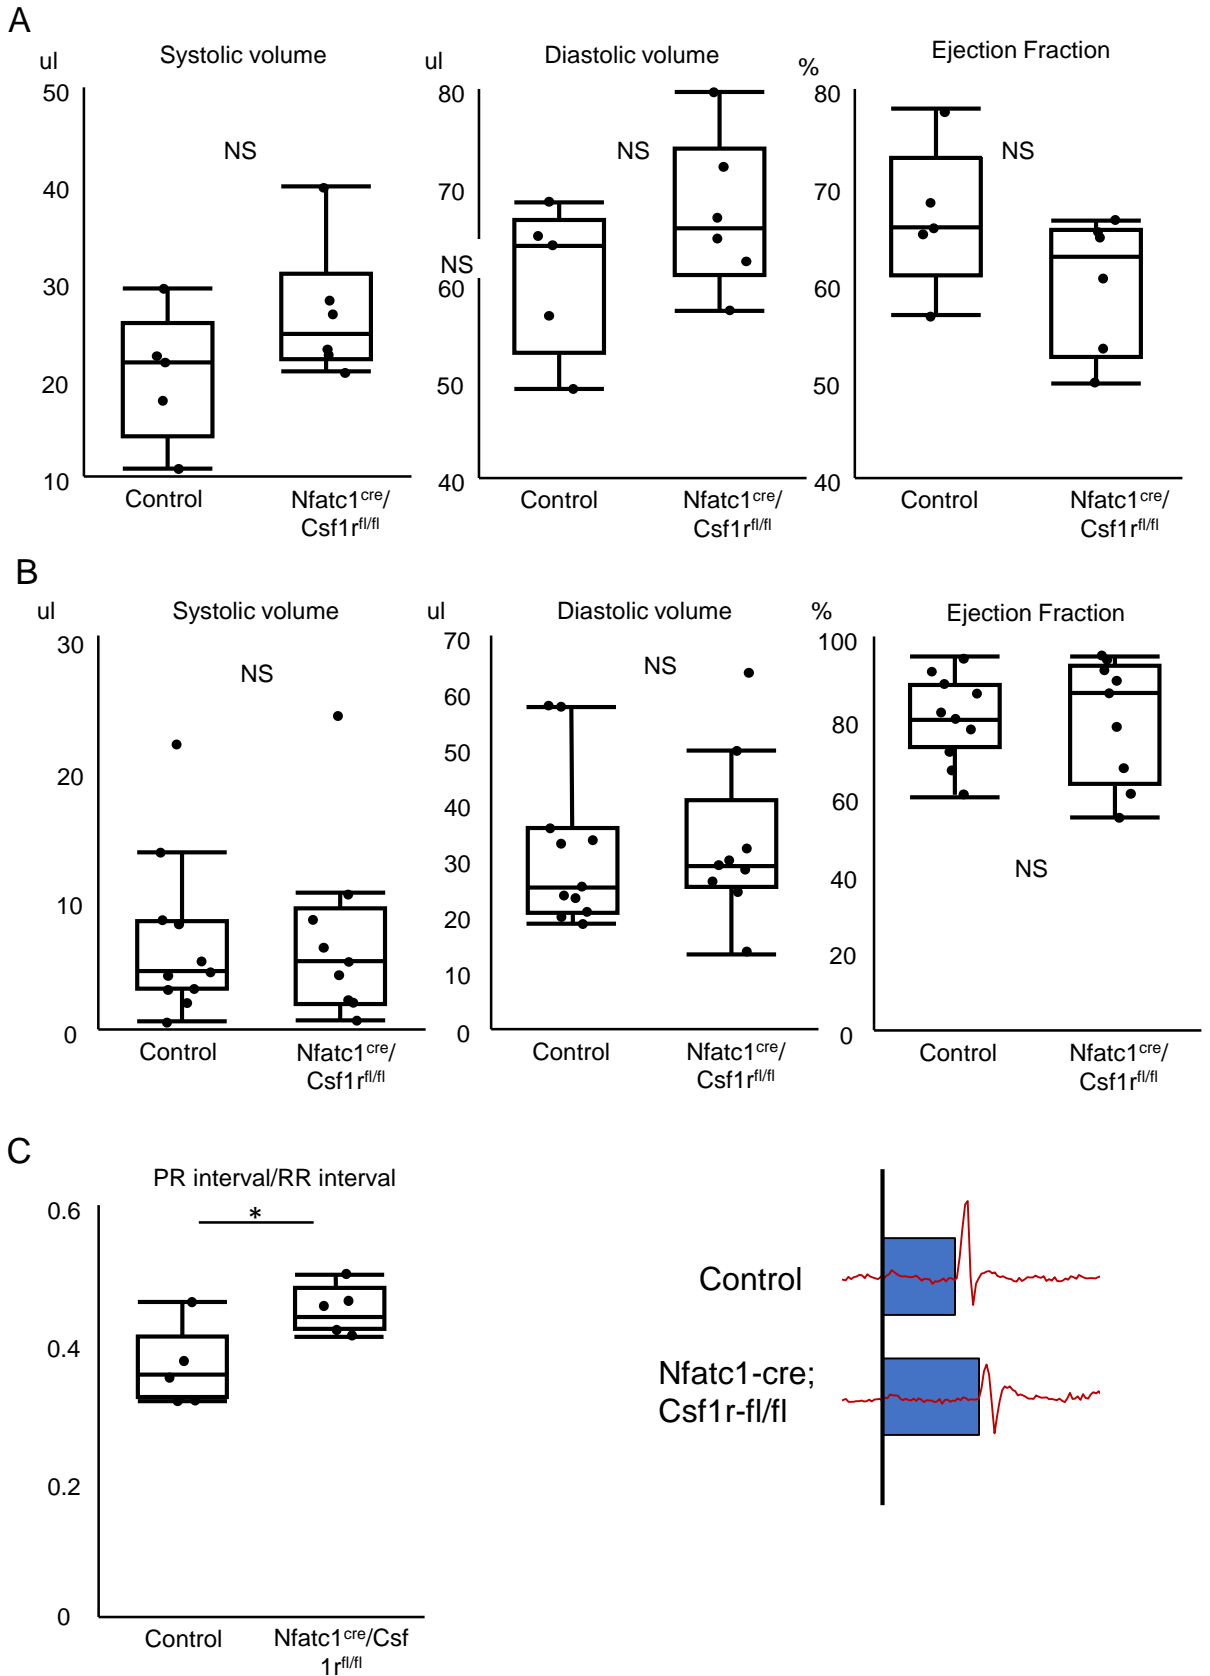

Figure S7

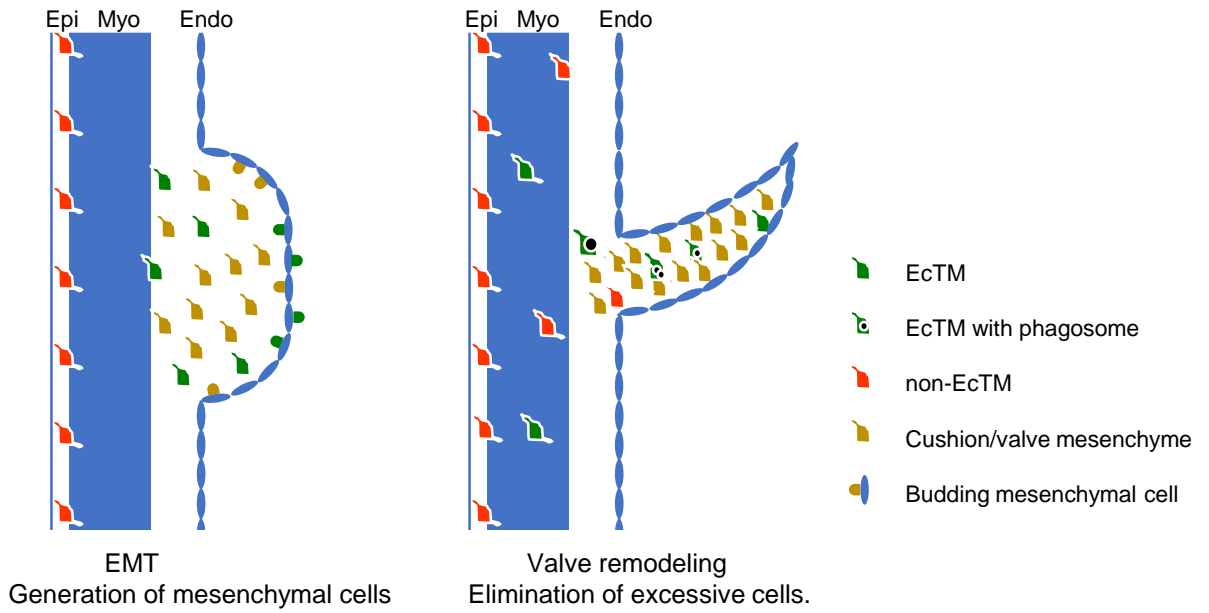

### Figure S1.

**EcTMs exist in the endocardial cushion during embryonic stages and valvular structures at the postnatal stage.** Related to Figure 3

- A. Immunofluorescent staining for Csf1r of the cushion endocardium of *Nfatc1<sup>cre/+</sup>; Rosa26<sup>YFP reporter/+</sup>* mouse at E10.5 (top) and E13.5 (bottom). Csf1r<sup>+</sup> YFP<sup>+</sup> cells are found underneath the endocardial layer. Note that Csf1r signal was not detected in the endocardium (arrowhead). Scale bar = 10  $\mu$ m.
- B, C. Immunofluorescent staining for CD68 (d) and CD206 (e) (red) in addition to cTnT (white) and YFP (green) in the cushion mesenchyme of *Nfatc1<sup>cre/+</sup>; Rosa26<sup>YFP reporter/+</sup>* at E13.5.
- D, E. Immunofluorescent staining for F4/80 (red), cTnT (white) and YFP (green) in the cushion (D) and subepicardium (E) of *Nfatc1<sup>cre/+</sup>; Rosa26<sup>YFP reporter/+</sup>* at E13.5.
- F. The percentage of YFP cells in F4/80<sup>+</sup> macrophages in the endocardial cushion and the subepicardium at E13.5 measured by ImageJ software. Note that EcTMs do not contribute significantly to the subepicardial macrophages.
- G-J. Semi-quantitative analyses of endocardial contribution to the macrophages in different regions. (G) Method for semi-quantitative assessment. Contribution of endocardium to CD68 (H), CD206 (I) and F4/80 (J) macrophages in aortic valve (AV) stem, mitral valve (MV) stem, AV leaflet, MV leaflet, atria, ventricle, and epicardium. n=3, each.

### Figure S2.

**Contribution of Nfatc1-derived cells to hematopoietic subpopulations in embryonic tissues.**

Related to Figure 4 and 5

- A. Representative flow cytometry plot for macrophages, monocytes, and granulocytes using *Nfatc1<sup>cre/+</sup>; Rosa26<sup>Tomato/+</sup>* heart.
- B. Flow cytometry quantification of %EcTMs in *Nfatc1<sup>cre/+</sup>; Runx1<sup>fl/fl</sup>* heart at E10.5 and 11.5. The number of EcTMs is not decreased in the mutants, suggesting that EcTMs are not dependent on Runx1. n = 4, 5, 3, 3 for WT E10.5, mutant E10.5, WT E11.5 and mutant E11.5, respectively.
- C. Ly6C<sup>low</sup>, CD206<sup>+</sup>, and CX3CR1<sup>+</sup> subsets of EcTMs and non-EcTMs during embryonic and postnatal development. n=3, each. Data represent mean  $\pm$  SE. \*  $P < 0.05$  by Spearman's rank correlation.

### Figure S3.

**Gross morphology of *Nfatc1<sup>cre/+</sup>; Csf1r<sup>fl/fl</sup>* mutant organs.** Related to Figure 7

- A. The genotype of the pups from the breedings of *Nfatc1<sup>cre/+</sup>; Csf1r<sup>fl/fl</sup>* and *Csf1r<sup>fl/fl</sup>; Nfatc1<sup>cre/+</sup>; Csf1r<sup>fl/fl</sup>* pup are significantly underrepresented at weaning.  $P < 0.05$  by  $\chi^2$  test.
- B. Representative images of the embryos and hearts from control and *Nfatc1<sup>cre/+</sup>; Csf1r<sup>fl/fl</sup>* mice.
- C. Body weight (BW) and heart weight (HW)/body weight (BW) comparison of control and *Nfatc1<sup>cre/+</sup>; Csf1r<sup>fl/fl</sup>* hearts. N = 2 and 4 for control and mutants, respectively. Data represent mean  $\pm$  SE. \*  $P < 0.05$  by unpaired t-test.
- D. Representative images of the spleen, kidney, lung, liver, brain, and intestine from control and *Nfatc1<sup>cre/+</sup>; Csf1r<sup>fl/fl</sup>* mice.



- E.** Organ weight per body weight (BW). No significant changes were found in the organ size other than the heart (**b**). N = 2 and 4 for control and mutants, respectively. Data represent mean  $\pm$  SE.

**Figure S4.**

**Valve histology of *Nfatc1<sup>cre/+</sup>*; *Csf1r<sup>fl/fl</sup>* embryos** Related to Figure 7

- A, B.** H-E staining and Movat's pentachrome staining of aortic valve (AV; **A**) and mitral valve (MV; **B**) from the wild-type (WT) control and *Nfatc1<sup>cre/+</sup>*; *Csf1r<sup>fl/fl</sup>* adult mice. The thickening of AV and MV is obvious in mutants at P8, but the ECM pattern was preserved during fetal and neonatal stages. Scale bar = 50  $\mu$ m
- C, D.** H-E staining of tricuspid (TV; **C**) and pulmonary (PV; **D**) valves of the control and *Nfatc1<sup>cre/+</sup>*; *Csf1r<sup>fl/fl</sup>* mice. Scale bar = 100  $\mu$ m

**Figure S5.**

**Valve phenotype of *Nfatc1<sup>cre/+</sup>*; *Csf1r<sup>fl/fl</sup>* mutants at perinatal stages** Related to Figure 7

- A.** Light sheet imaging of the neonatal valves. Representative images of the 4-chamber section (left), coronal slice at the level of the aortic valve (middle), and cross section at the level of the aortic valve (right) of the hearts from *Nfatc1<sup>cre/+</sup>*; *Csf1r<sup>fl/fl</sup>* mouse and its wild-type littermate.
- B.** Activity of valvular interstitial cells in *Nfatc1<sup>cre/+</sup>*; *Csf1r<sup>fl/fl</sup>* hearts. Representative vimentin (green) and  $\alpha$ -SMA (red) immunostaining of the aortic valves of the control and *Nfatc1<sup>cre/+</sup>*; *Csf1r<sup>fl/fl</sup>* mice at E15.5 (a) and P1 (b). Note that  $\alpha$ -SMA staining is more intense in mutants at both E15.5 and P1.
- C.** pH3 staining of valve interstitial cells in *Nfatc1<sup>cre/+</sup>*; *Csf1r<sup>fl/fl</sup>* hearts.

**Figure S6.**

**Cardiac function of *Nfatc1<sup>cre/+</sup>*; *Csf1r<sup>fl/fl</sup>* adult mice** Related to Figure 7

- A.** Cardiac contractility measured by echocardiography.
- B.** Cardiac contractility measured by  $\mu$ MRI.
- C.** EKG analysis. PR interval was significantly prolonged in mutants. Data represent mean  $\pm$  SE. n = 5. \* $P < 0.05$ .

**Figure S7.**

**Model for the role of endocardially-derived cardiac tissue macrophages**

Related to Figure 1, 3, 5, 6 and 7

Mesenchymal cells are generated from cushion endocardium at E9.5-10.5. During this EMT process, tissue macrophages also arise from cushion endocardium (left). These endocardially-derived macrophages play a phagocytotic role to eliminate excessive mesenchymal cells, thereby facilitating valve remodeling.
